# Supplementary material for: Facile synthesis of partially oxidized Mn3O4-functionalized carbon cathodes for rechargeable Li–O2 batteries
Source: Royal Society of Chemistry journal article supplement (doi:10.1039/c8ra02920b), 2018-01-01
Supplement: c8ra02920b1.pdf [file c8ra02920b1.pdf]

## **Electronic Supplementary Information (ESI)**

# **Facile synthesis of partially oxidized Mn<sub>3</sub>O<sub>4</sub>- functionalized carbon cathodes for rechargeable Li–O<sub>2</sub> batteries**

Juhyoung Kim, Inhan Kang, Soyeon Kim, Jungwon Kang\*

Department of Advanced Materials Science and Engineering, Mokpo National University, 61  
dorim-ri, 1666 Yeongsan-ro, Cheonggye-myeon, Muan-gun, Jeonnam, South Korea

\*Corresponding author: [jwkang17@mokpo.ac.kr](mailto:jwkang17@mokpo.ac.kr)

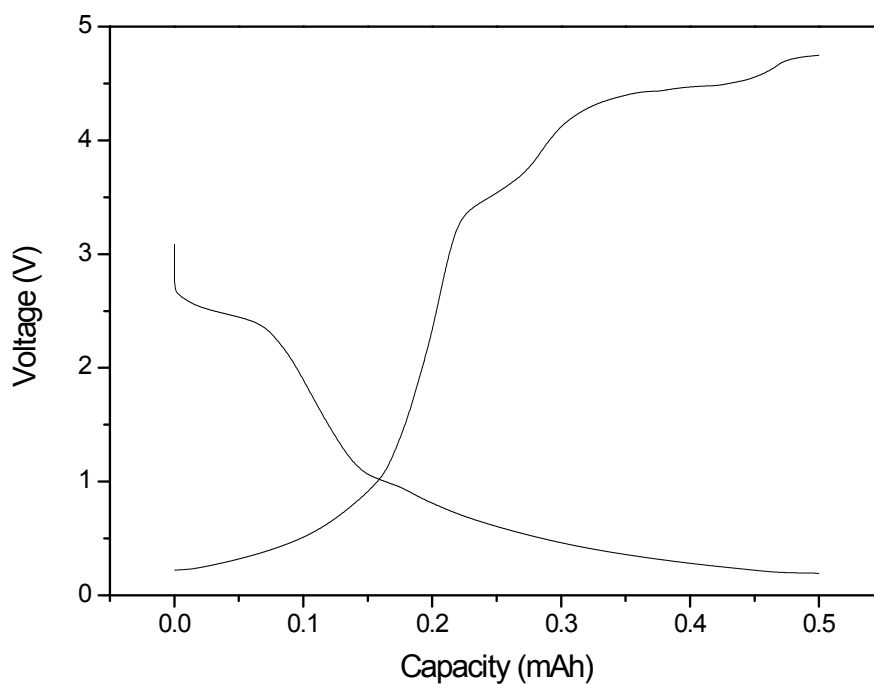

Figure S1. First discharge-charge profile of sample heated at 400 °C. Sample preparation: Manganese (II) acetate tetrahydrate ( $(\text{CH}_3\text{COO})_2\text{Mn}\cdot 4\text{H}_2\text{O}$ -98%, Daejung) was dissolved in ethanol (99.9%, Daejung). Carbon paper (P50, AvCarb<sup>®</sup>) was dipped in manganese acetate solution and then dried. The manganese acetate-immersed P50 was then heated at 400 °C for 10h in air.

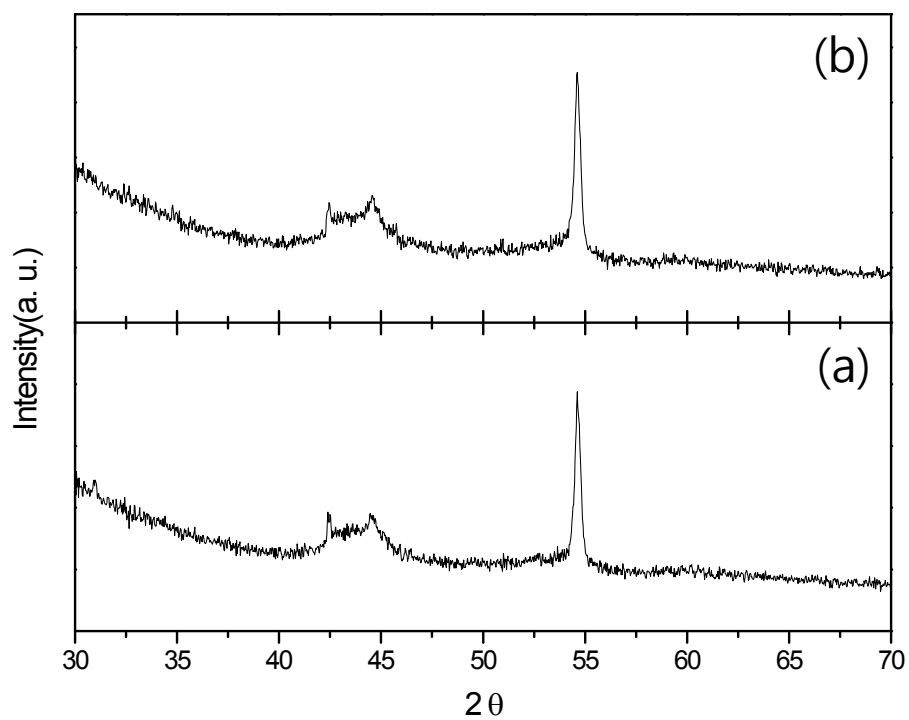

Figure S2. XRD patterns of (a) pristine P50 and (b) the sample heated at  $300^\circ\text{C}$ . Sample preparation: Manganese (II) acetate tetrahydrate ( $(\text{CH}_3\text{COO})_2\text{Mn}\cdot 4\text{H}_2\text{O}$ -98%, Daejung) was dissolved in ethanol (99.9%, Daejung). Carbon paper (P50, AvCarb<sup>®</sup>) was dipped in manganese acetate solution and then dried. The manganese acetate-immersed P50 was heated at  $300^\circ\text{C}$  for 10h in air.

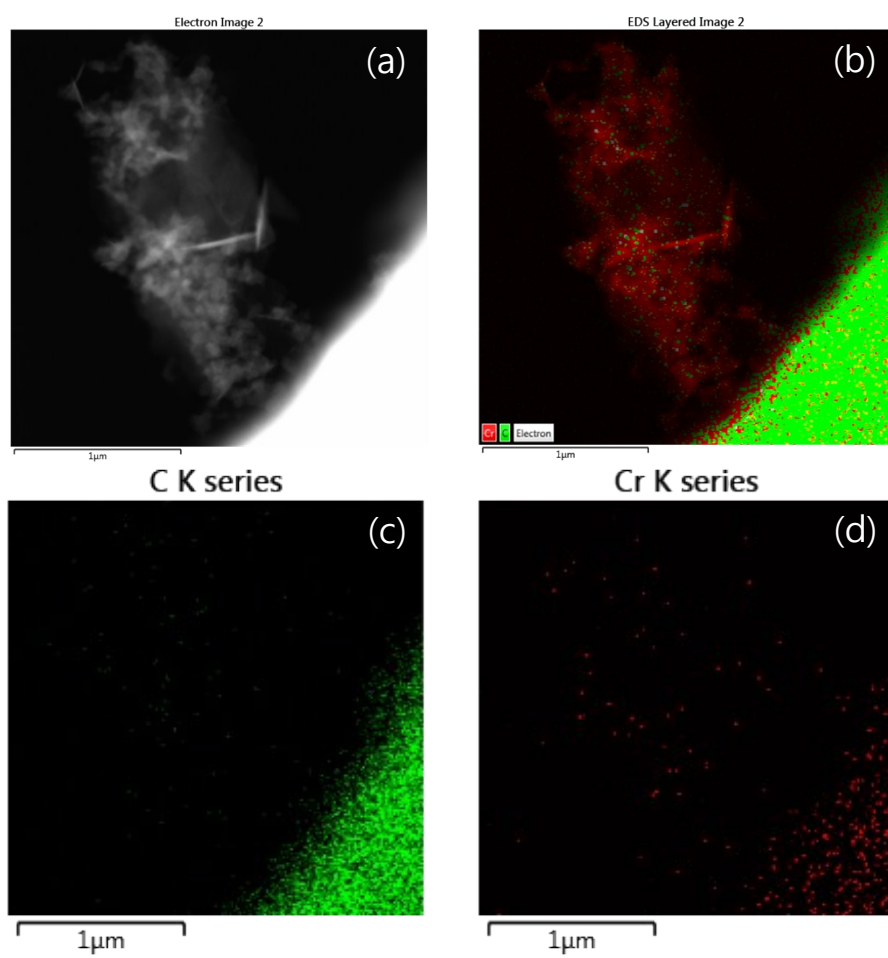

Figure S3. (a) Dark field and (b) elemental mapping images and corresponding elemental mapping images for (c) C and (d) Cr of the pristine P50
